# Supplementary material
Source: PubMed Central journal article supplement (PMC3848404)
Supplement: CJN.04260413_CJN04260413SupplementaryData.pdf [file CJN.04260413_CJN04260413SupplementaryData.pdf]

**Supplemental Tables for the Following Manuscript:**

CKD-Mineral and Bone Disorder and Risk of Death And Cardiovascular Hospitalization in Patients on Hemodialysis

**Additional Methods:**

Time-to-event models were constructed to estimate each patient's non-CKD-MBD risk of each of the two endpoints. Predicted probabilities of each outcome over the 16 month follow-up period were estimated using the baseline function in SAS Proc PHREG. Each predicted probability was included as a covariate in the corresponding CKD-MBD risk model of risk for each outcome, along with the CKD-MBD exposure groups.

**Description of Additional Tables and Figures:**

The two tables in this supplement show the results for a model identical to the one published by Liu, et al. for describing comorbidity burden in dialysis patients using claims data and data from the Medical Evidence form. In addition, the tables show the results for the same base model and patient cohort, after adding additional risk factors that were available from the DaVita, Inc data. The models with the additional risk factors are the disease models used to estimate the 16-month probability for each outcome. These probabilities were used to estimate the background risk of each outcome, ignoring CKD-MBD parameters (PTH, calcium, and phosphate). These probabilities were then used in the second stage of modeling along with the CKD-MBD phenotypes.

The figures show the distribution of the predicted probabilities for each outcome for all patients in the cohort.

Supplemental Table 1: Model by Liu, et al., for Mortality With and Without Additional Risk Factors

|                                                       |                  | Results Based on Model by Liu, et al. |                       |      |         | Results After Adding Additional Risk Factors |                       |      |         |
|-------------------------------------------------------|------------------|---------------------------------------|-----------------------|------|---------|----------------------------------------------|-----------------------|------|---------|
| Variable                                              |                  | Hazard Ratio                          | 95% Confidence Limits |      | p-value | Hazard Ratio                                 | 95% Confidence Limits |      | p-value |
| <b>Age, group, years (vs. ≥ 80)</b>                   | 0-29             | 0.20                                  | 0.14                  | 0.28 | <.0001  | 0.24                                         | 0.17                  | 0.35 | <.0001  |
|                                                       | 30-39            | 0.21                                  | 0.17                  | 0.26 | <.0001  | 0.26                                         | 0.21                  | 0.31 | <.0001  |
|                                                       | 40-49            | 0.34                                  | 0.30                  | 0.38 | <.0001  | 0.40                                         | 0.36                  | 0.45 | <.0001  |
|                                                       | 50-59            | 0.41                                  | 0.38                  | 0.45 | <.0001  | 0.48                                         | 0.44                  | 0.52 | <.0001  |
|                                                       | 60-64            | 0.46                                  | 0.42                  | 0.51 | <.0001  | 0.54                                         | 0.49                  | 0.59 | <.0001  |
|                                                       | 65-69            | 0.54                                  | 0.49                  | 0.59 | <.0001  | 0.62                                         | 0.57                  | 0.68 | <.0001  |
|                                                       | 70-79            | 0.68                                  | 0.63                  | 0.73 | <.0001  | 0.75                                         | 0.70                  | 0.81 | <.0001  |
| <b>Sex (vs. Male)</b>                                 | Female           | 0.97                                  | 0.92                  | 1.02 | 0.24    | 1.03                                         | 0.97                  | 1.08 | 0.34    |
| <b>Race (vs. White)</b>                               | Asian            | 0.84                                  | 0.74                  | 0.96 | 0.01    | 0.82                                         | 0.72                  | 0.93 | 0.00    |
|                                                       | African American | 0.84                                  | 0.80                  | 0.89 | <.0001  | 0.76                                         | 0.71                  | 0.80 | <.0001  |
|                                                       | Native American  | 0.92                                  | 0.78                  | 1.07 | 0.27    | 0.87                                         | 0.74                  | 1.02 | 0.09    |
|                                                       | Other/Unknown    | 0.97                                  | 0.76                  | 1.22 | 0.77    | 0.91                                         | 0.72                  | 1.15 | 0.42    |
| <b>ESRD primary cause (vs. GN/PKD)</b>                | Diabetes         | 1.16                                  | 1.05                  | 1.29 | 0.00    | 1.22                                         | 1.10                  | 1.36 | 0.00    |
|                                                       | Hypertension     | 1.08                                  | 0.99                  | 1.19 | 0.10    | 1.16                                         | 1.06                  | 1.28 | 0.00    |
|                                                       | Other            | 1.18                                  | 1.05                  | 1.31 | 0.00    | 1.15                                         | 1.03                  | 1.28 | 0.02    |
| <b>Comorbid conditions (vs. Absence of condition)</b> | ASHD             | 1.05                                  | 0.98                  | 1.11 | 0.15    | 1.04                                         | 0.98                  | 1.10 | 0.21    |
|                                                       | CHF              | 1.43                                  | 1.35                  | 1.52 | <.0001  | 1.36                                         | 1.28                  | 1.44 | <.0001  |
|                                                       | CVA              | 1.27                                  | 1.19                  | 1.35 | <.0001  | 1.15                                         | 1.08                  | 1.22 | <.0001  |
|                                                       | PVD              | 1.26                                  | 1.19                  | 1.33 | <.0001  | 1.13                                         | 1.07                  | 1.19 | <.0001  |
|                                                       | Other cardiac    | 1.19                                  | 1.12                  | 1.27 | <.0001  | 1.09                                         | 1.02                  | 1.15 | 0.01    |
|                                                       | COPD             | 1.34                                  | 1.26                  | 1.42 | <.0001  | 1.29                                         | 1.22                  | 1.38 | <.0001  |
|                                                       | GI               | 1.20                                  | 1.11                  | 1.30 | <.0001  | 1.04                                         | 0.96                  | 1.13 | 0.38    |
|                                                       | Liver disease    | 1.20                                  | 1.06                  | 1.37 | 0.00    | 1.02                                         | 0.89                  | 1.15 | 0.82    |
|                                                       | Dysrhythmia      | 1.20                                  | 1.13                  | 1.27 | <.0001  | 1.13                                         | 1.06                  | 1.20 | 0.00    |
|                                                       | Cancer           | 1.19                                  | 1.09                  | 1.29 | <.0001  | 1.13                                         | 1.04                  | 1.23 | 0.00    |
|                                                       | Diabetes         | 1.11                                  | 1.03                  | 1.19 | 0.01    | 1.11                                         | 1.03                  | 1.20 | 0.01    |
| <b>Vintage, month (vs. 12-24)</b>                     | 25-48            |                                       |                       |      |         | 1.04                                         | 0.97                  | 1.12 | 0.23    |
|                                                       | ≥49              |                                       |                       |      |         | 1.23                                         | 1.15                  | 1.31 | <.0001  |
| <b>Albumin, g/dl</b>                                  | continuous       |                                       |                       |      |         | 0.30                                         | 0.28                  | 0.33 | <.0001  |
| <b>Hemoglobin, g/dl</b>                               | continuous       |                                       |                       |      |         | 0.89                                         | 0.87                  | 0.92 | <.0001  |
| <b>Kt/V</b>                                           | continuous       |                                       |                       |      |         | 0.48                                         | 0.43                  | 0.54 | <.0001  |
| <b>BMI, kg/m<sup>2</sup></b>                          | continuous       |                                       |                       |      |         | 0.96                                         | 0.96                  | 0.97 | <.0001  |
| <b>Hypertension</b>                                   | continuous       |                                       |                       |      |         | 0.89                                         | 0.76                  | 1.04 | 0.14    |
| <b>Current smoking (vs. No)</b>                       |                  |                                       |                       |      |         | 1.11                                         | 0.98                  | 1.25 | 0.10    |

**Supplemental Table 2: Model by Liu, et al., for the Composite Endpoint, With and Without Additional Risk Factors**

| Variable                                              |                  | Results Based on Model by Liu, et al. |                       |      |         | Results After Adding Additional Risk Factors |                       |      |         |
|-------------------------------------------------------|------------------|---------------------------------------|-----------------------|------|---------|----------------------------------------------|-----------------------|------|---------|
|                                                       |                  | Hazard Ratio                          | 95% Confidence Limits |      | p-value | Hazard Ratio                                 | 95% Confidence Limits |      | p-value |
| <b>Age, group, years (vs. ≥80)</b>                    | 0-29             | 0.70                                  | 0.59                  | 0.82 | <.0001  | 0.78                                         | 0.66                  | 0.93 | 0.00    |
|                                                       | 30-39            | 0.58                                  | 0.52                  | 0.64 | <.0001  | 0.64                                         | 0.57                  | 0.71 | <.0001  |
|                                                       | 40-49            | 0.69                                  | 0.64                  | 0.74 | <.0001  | 0.75                                         | 0.69                  | 0.81 | <.0001  |
|                                                       | 50-59            | 0.68                                  | 0.64                  | 0.73 | <.0001  | 0.74                                         | 0.70                  | 0.79 | <.0001  |
|                                                       | 60-64            | 0.74                                  | 0.69                  | 0.79 | <.0001  | 0.80                                         | 0.74                  | 0.86 | <.0001  |
|                                                       | 65-69            | 0.75                                  | 0.70                  | 0.81 | <.0001  | 0.81                                         | 0.76                  | 0.87 | <.0001  |
|                                                       | 70-79            | 0.81                                  | 0.76                  | 0.86 | <.0001  | 0.86                                         | 0.81                  | 0.91 | <.0001  |
| <b>Sex (vs. Male)</b>                                 | Female           | 1.03                                  | 0.99                  | 1.06 | 0.19    | 1.08                                         | 1.04                  | 1.12 | 0.00    |
| <b>Race (vs. White)</b>                               | Asian            | 0.92                                  | 0.84                  | 1.01 | 0.07    | 0.90                                         | 0.82                  | 0.99 | 0.02    |
|                                                       | African American | 1.04                                  | 1.00                  | 1.09 | 0.04    | 0.98                                         | 0.94                  | 1.02 | 0.38    |
|                                                       | Native American  | 0.89                                  | 0.79                  | 1.00 | 0.05    | 0.89                                         | 0.79                  | 1.00 | 0.05    |
|                                                       | Other            | 0.81                                  | 0.68                  | 0.98 | 0.03    | 0.79                                         | 0.66                  | 0.96 | 0.01    |
| <b>ESRD primary cause (vs. GN/PKD)</b>                | Diabetes         | 1.03                                  | 0.96                  | 1.11 | 0.47    | 1.04                                         | 0.97                  | 1.12 | 0.26    |
|                                                       | Hypertension     | 1.03                                  | 0.97                  | 1.10 | 0.36    | 1.06                                         | 0.99                  | 1.13 | 0.11    |
|                                                       | Other            | 1.02                                  | 0.94                  | 1.10 | 0.71    | 1.00                                         | 0.92                  | 1.08 | 0.97    |
| <b>Comorbid conditions (vs. Absence of condition)</b> | ASHD             | 1.27                                  | 1.21                  | 1.32 | <.0001  | 1.25                                         | 1.20                  | 1.31 | <.0001  |
|                                                       | CHF              | 1.42                                  | 1.36                  | 1.48 | <.0001  | 1.38                                         | 1.32                  | 1.44 | <.0001  |
|                                                       | CVA              | 1.21                                  | 1.15                  | 1.26 | <.0001  | 1.15                                         | 1.10                  | 1.21 | <.0001  |
|                                                       | PVD              | 1.19                                  | 1.14                  | 1.24 | <.0001  | 1.12                                         | 1.08                  | 1.17 | <.0001  |
|                                                       | Other cardiac    | 1.35                                  | 1.29                  | 1.41 | <.0001  | 1.28                                         | 1.22                  | 1.34 | <.0001  |
|                                                       | COPD             | 1.31                                  | 1.25                  | 1.37 | <.0001  | 1.29                                         | 1.23                  | 1.35 | <.0001  |
|                                                       | GI               | 1.19                                  | 1.11                  | 1.26 | <.0001  | 1.10                                         | 1.03                  | 1.17 | 0.00    |
|                                                       | Liver Disease    | 1.11                                  | 1.00                  | 1.22 | 0.04    | 1.02                                         | 0.93                  | 1.13 | 0.67    |
|                                                       | Dysrhythmia      | 1.22                                  | 1.17                  | 1.28 | <.0001  | 1.19                                         | 1.14                  | 1.25 | <.0001  |
|                                                       | Cancer           | 1.11                                  | 1.04                  | 1.18 | 0.00    | 1.08                                         | 1.01                  | 1.16 | 0.02    |
|                                                       | Diabetes         | 1.11                                  | 1.05                  | 1.17 | 0.00    | 1.12                                         | 1.06                  | 1.18 | <.0001  |
| <b>Vinatage, month (vs. 12-24)</b>                    | 25-48            |                                       |                       |      |         | 1.11                                         | 1.06                  | 1.17 | <.0001  |
|                                                       | ≥49              |                                       |                       |      |         | 1.16                                         | 1.10                  | 1.21 | <.0001  |
| <b>Albumin</b>                                        | continuous       |                                       |                       |      |         | 0.61                                         | 0.58                  | 0.65 | <.0001  |
| <b>Hemoglobin</b>                                     | continuous       |                                       |                       |      |         | 0.90                                         | 0.88                  | 0.92 | <.0001  |
| <b>Kt/V</b>                                           | continuous       |                                       |                       |      |         | 0.62                                         | 0.57                  | 0.67 | <.0001  |
| <b>BMI</b>                                            | continuous       |                                       |                       |      |         | 0.98                                         | 0.98                  | 0.98 | <.0001  |
| <b>Hypertension</b>                                   | continuous       |                                       |                       |      |         | 1.39                                         | 1.22                  | 1.58 | <.0001  |
| <b>Current smoking (vs. No)</b>                       |                  |                                       |                       |      |         | 1.17                                         | 1.07                  | 1.27 | 0.00    |

Supplemental Figure 1: Distribution of the Predicted Probability of Death

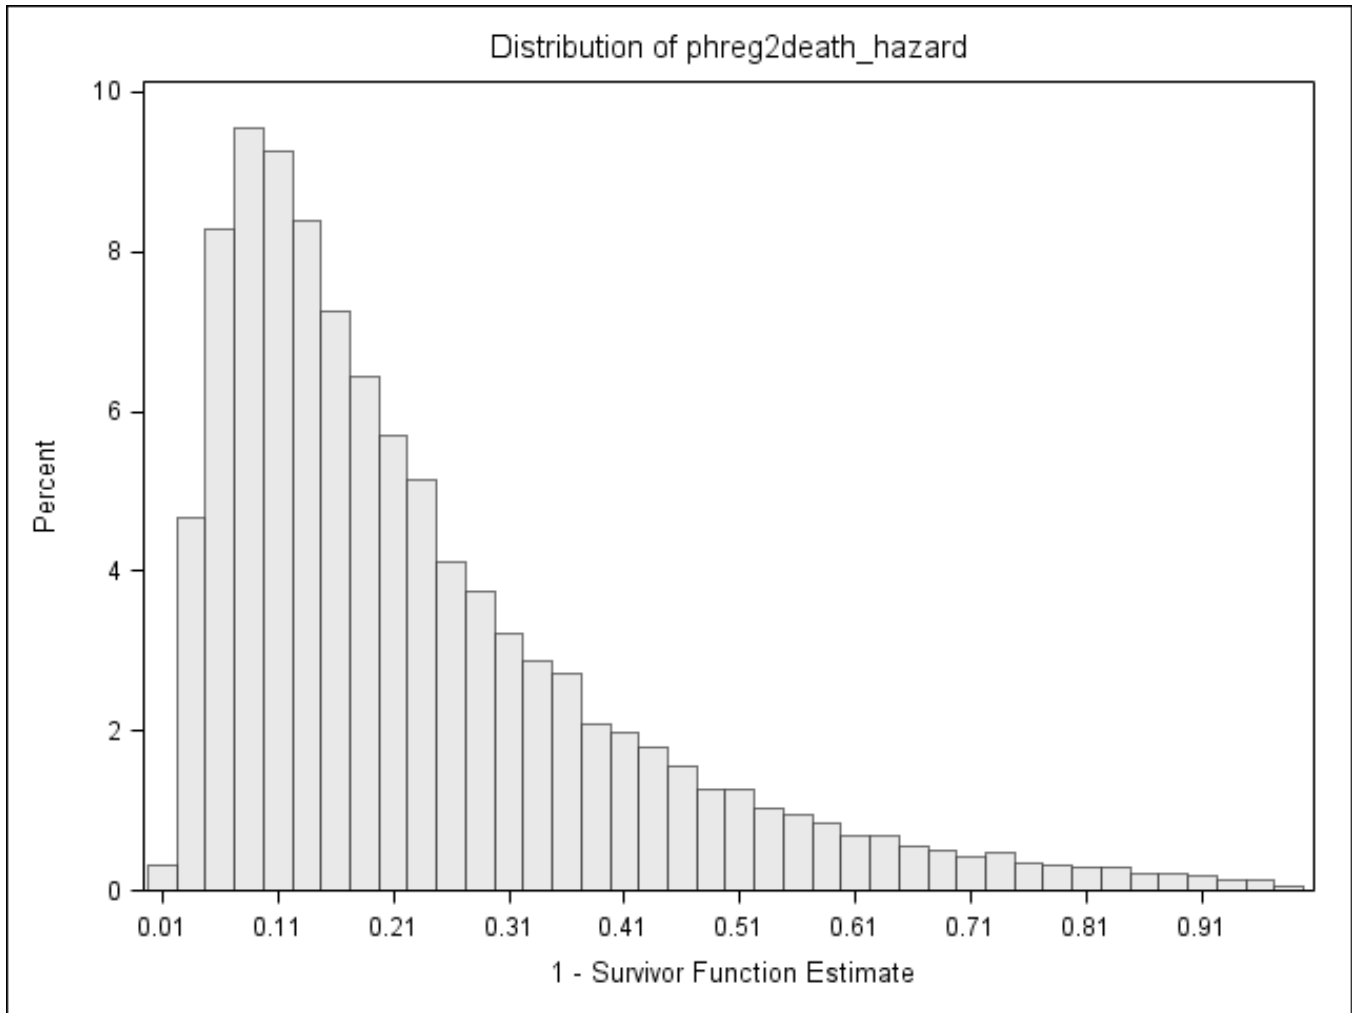

Note: Results reflect the 16-month predicted probability of death from the Cox proportional hazards model for each patient using the baseline command in SAS Proc PHREG.

**Supplemental Figure 2: Distribution of the Predicted Probability of the Composite Endpoint of Cardiovascular Hospitalization or Death**

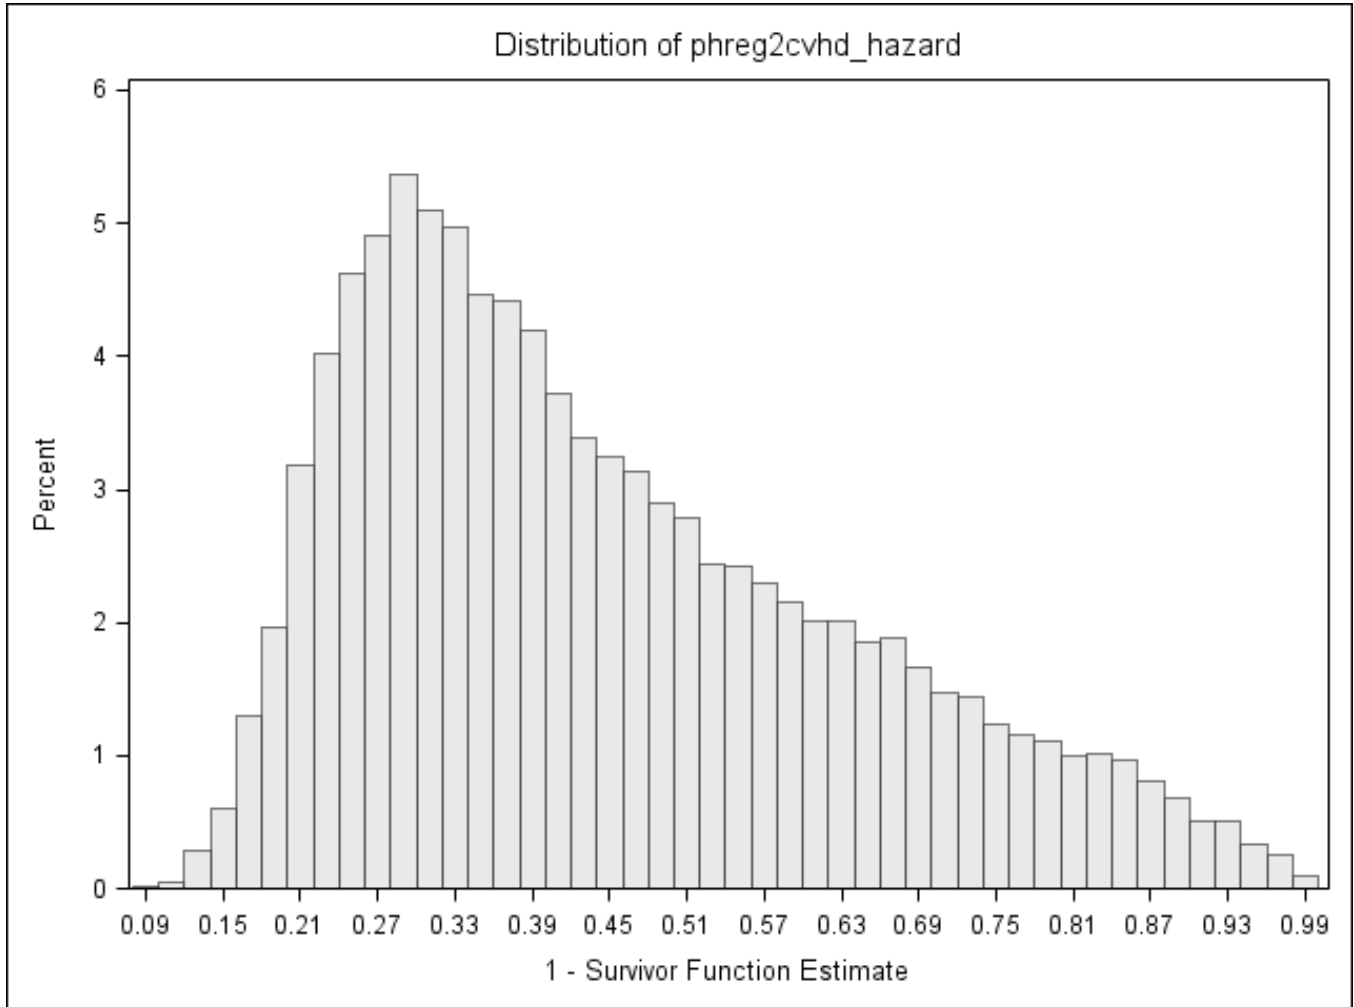

Note: Results reflect the 16-month predicted probability of the composite event from the Cox proportional hazards model for each patient using the baseline command in SAS Proc PHREG.
